# Supplementary material
Source: PubMed Central journal article supplement (PMC3724762)
Supplement: NIHMS450138-supplement-01.pdf [file NIHMS450138-supplement-01.pdf]

## SUPPLEMENT

### **PEGylation of cationic, shell-crosslinked-knedel-like nanoparticles modulates inflammation and enhances cellular uptake in the lung**

Aida Ibricevic, MD PhD<sup>1</sup>, Sean P. Guntsen, BS<sup>1</sup>, Ke Zhang PhD<sup>2</sup>, Ritu Shrestha, PhD<sup>4</sup>, Yongjian Liu, PhD<sup>3</sup>, Jing Yi Sun, BS<sup>1</sup>, Michael J. Welch, PhD<sup>3,†</sup>, Karen L. Wooley, PhD<sup>2,4</sup> and Steven L. Brody, MD<sup>1,3,\*</sup>

Supplement contents: Methods and Table: 1

#### **Cell culture and endocytosis inhibitor treatments**

*Cell culture.* MLE 12 (ATCC, Manassas, VA), a mouse cell line with features of alveolar type II cells was cultured in media recommended by ATCC.

*Endocytosis inhibitors.* Inhibitors were from Sigma-Aldrich. Phagocytosis was inhibited by latrunculin B (1  $\mu$ M), and macropinocytosis by cytochalasin D (10  $\mu$ M) and nocodazole (33  $\mu$ M). Methyl- $\beta$ -cyclodextran (MbCD, 100  $\mu$ M) was used to disrupt lipid raft-mediated endocytosis by sequestration of cholesterol. Monodansylcadaverine (MDC, 200  $\mu$ M) and chlorpromazine (CPM, 100  $\mu$ M) were used to inhibit clathrin-mediated endocytosis, and dynasore (10  $\mu$ M) to inhibit dynamin-mediated endocytosis. Cells ( $5 \times 10^4$ /well) were pretreated with inhibitors for 30 min, then incubated with nanoparticles (7.5 mg/mL) for 1 h, followed by flow cytometry. cSCK labeled with Alexa Fluor 488 were co-localized in cells using a FACSCalibur flow cytometer with CELLquest software (BD Biosciences).

**Supplementary Table 1: Effect of endocytosis inhibitors on cell uptake of cSCK**

| Endocytosis inhibitor                        | Pathway affected and effect on endocytosis                          | Percent of nanoparticle cell uptake |              |              |              |
|----------------------------------------------|---------------------------------------------------------------------|-------------------------------------|--------------|--------------|--------------|
|                                              |                                                                     | non-PEG cSCK                        | cSCK-2PEG    | cSCK-5PEG    | cSCK-10PEG   |
| Latrunculin B                                | Phagocytosis:<br>Disrupts microfilaments                            | 112.1 ± 5.2                         | 110.9 ± 1.8  | 102.4 ± 5.8  | 101.1 ± 2.2  |
| Nocodazole                                   | Macro-pinocytosis:<br>Depolymerizes microtubule                     | 90.9 ± 19.2                         | 88.6 ± 5.2   | 94.6 ± 4.6   | 91.0 ± 4.9   |
| Cytochalasin D                               | Macro-pinocytosis:<br>Inhibitor of F-actin polymerization           | 110.0 ± 12.5                        | 110.6 ± 20.3 | 106.4 ± 7.6  | 101.3 ± 5.1  |
| Monodansyl-cadaverine (MDC)                  | Clathrin-mediated pinocytosis:<br>Inhibitor of fibrin stabilization | 72.4 ± 7.1*                         | 89.7 ± 22.1  | 103.1 ± 15.7 | 89.8 ± 3.3   |
| Chlorpromazine (CPM)                         | Clathrin-mediated pinocytosis:<br>Inhibitor of AP2 function         | 70.6 ± 7.9*                         | 88.3 ± 10.1  | 98.4 ± 9.8   | 96.6 ± 5.8   |
| Methyl- $\beta$ -cyclodextran (M $\beta$ CD) | Lipid raft - mediated pinocytosis:<br>Cholesterol depletion         | 92.2 ± 8.7                          | 100.5 ± 9.0  | 103.2 ± 3.3  | 99.2 ± 6.4   |
| Dynasore                                     | Dynamin-mediated pinocytosis:<br>Dynamin 1 and 2 GTPase inhibitor   | 12.6 ± 5.4*                         | 33.1 ± 5.6*  | 39.2 ± 9.0*  | 58.0 ± 13.4* |

A significant difference in uptake compared to no inhibitor controls is indicated (ANOVA, \* $p < 0.05$ ).
